# Supplementary material for: The ability of seeds to float with water currents contributes to the invasion success of Impatiens balfourii and I. glandulifera
Source: PubMed Central journal article supplement (PMC7429548; doi:10.1007/s10265-020-01212-0), 2020-07-03
Supplement: 10265_2020_1212_MOESM1_ESM.pdf [file 10265_2020_1212_MOESM1_ESM.pdf]

## Electronic Supplementary Material

Title: The ability of seeds to float with water currents contributes to the invasion success of *Impatiens balfourii* and *I. glandulifera*

Najberek Kamil<sup>1\*</sup>, Olejniczak Paweł<sup>1</sup>, Berent Katarzyna<sup>2</sup>, Gąsienica-Staszeczek Magdalena<sup>3</sup>, Solarz Wojciech<sup>1</sup>

\* Corresponding author. Email: najberek@iop.krakow.pl

Affiliations of authors:

<sup>1</sup> Institute of Nature Conservation, Polish Academy of Sciences, al. Adama Mickiewicza 33, 31-120 Kraków, Poland

<sup>2</sup> AGH University of Science and Technology, Academic Centre for Materials and Nanotechnology, al. Adama Mickiewicza 30, 30-059 Kraków, Poland

<sup>3</sup> Wojdyły 13/9, 34-500 Zakopane

**Table S1.** Data on the physical characteristics of the seeds from the non-invasive alien species ('NIAS') *Impatiens balfourii* and the invasive alien species ('IAS') *I. glandulifera* populations. The data were used to assess the seed size, circularity and aspect ratio. The table includes average values ( $\pm$  SD) of the seed area, seed weight, seed perimeter and the length of major and minor seed axes.

| Population age                       | Area [mm <sup>2</sup> ] | Perimeter [mm]   | Major axis [mm] | Minor axis [mm] | Circularity     | Weight [g]      | Ss Index [mm <sup>2</sup> /g] |
|--------------------------------------|-------------------------|------------------|-----------------|-----------------|-----------------|-----------------|-------------------------------|
| <b><i>I. balfourii</i> (NIAS):</b>   |                         |                  |                 |                 |                 |                 |                               |
| Younger population                   | 4.42 $\pm$ 0.81         | 8.18 $\pm$ 0.73  | 2.89 $\pm$ 0.24 | 1.93 $\pm$ 0.24 | 0.82 $\pm$ 0.03 | 1.60 $\pm$ 0.51 | 3.46 $\pm$ 2.33               |
| Older population                     | 4.05 $\pm$ 0.71         | 7.73 $\pm$ 0.64  | 2.72 $\pm$ 0.24 | 1.89 $\pm$ 0.24 | 0.85 $\pm$ 0.04 | 1.54 $\pm$ 0.90 | 4.16 $\pm$ 3.87               |
| <b><i>I. glandulifera</i> (IAS):</b> |                         |                  |                 |                 |                 |                 |                               |
| Younger population                   | 9.23 $\pm$ 2.09         | 11.61 $\pm$ 1.33 | 3.75 $\pm$ 7.25 | 3.09 $\pm$ 0.44 | 0.85 $\pm$ 0.03 | 3.95 $\pm$ 1.11 | 2.56 $\pm$ 1.04               |
| Older population                     | 9.13 $\pm$ 2.15         | 11.82 $\pm$ 1.39 | 3.99 $\pm$ 0.44 | 2.88 $\pm$ 0.44 | 0.81 $\pm$ 0.05 | 1.16 $\pm$ 0.35 | 9.99 $\pm$ 8.18               |

**Table S2.** Data on the roughness of the seeds from the non-invasive alien species ('NIAS') *Impatiens balfourii* and the invasive alien species ('IAS') *I. glandulifera* populations. Sa – Arithmetical mean height, Sq – Root mean square height, Sp – Maximum peak height.

| Population age                       | Seed no. | Sa [ $\mu\text{m}$ ] | Sq [ $\mu\text{m}$ ] | Sp [ $\mu\text{m}$ ] |
|--------------------------------------|----------|----------------------|----------------------|----------------------|
| <b><i>I. balfourii</i> (NIAS):</b>   |          |                      |                      |                      |
| Younger population                   | 1        | 6.78                 | 8.77                 | 318.15               |
|                                      | 2        | 8.25                 | 10.04                | 30.98                |
|                                      | 3        | 8.83                 | 11.55                | 39.81                |
| Older population                     | 1        | 11.93                | 14.89                | 307.84               |
|                                      | 2        | 4.20                 | 5.20                 | 18.68                |
|                                      | 3        | 7.66                 | 9.45                 | 39.21                |
| <b><i>I. glandulifera</i> (IAS):</b> |          |                      |                      |                      |
| Younger population                   | 1        | 6.89                 | 9.09                 | 32.28                |
|                                      | 2        | 12.73                | 15.97                | 39.37                |
|                                      | 3        | 6.94                 | 8.67                 | 35.64                |
| Older population                     | 1        | 18.94                | 23.66                | 565.86               |
|                                      | 2        | 10.56                | 13.10                | 34.36                |
|                                      | 3        | 5.85                 | 7.36                 | 31.05                |
